# Supplementary material for: Human Memory B Cells Targeting Staphylococcus aureus Exotoxins Are Prevalent with Skin and Soft Tissue Infection
Source: PubMed Central journal article supplement (PMC5850327; doi:10.1128/mbio.02125-17), 2018-03-13

***S. aureus* SSTI**

**uninfected controls**

**non-*S. aureus* SSTI controls**

**PBMC (no stim)**

**PBMC (+ CpG2006/IL-21/sCD40L)**

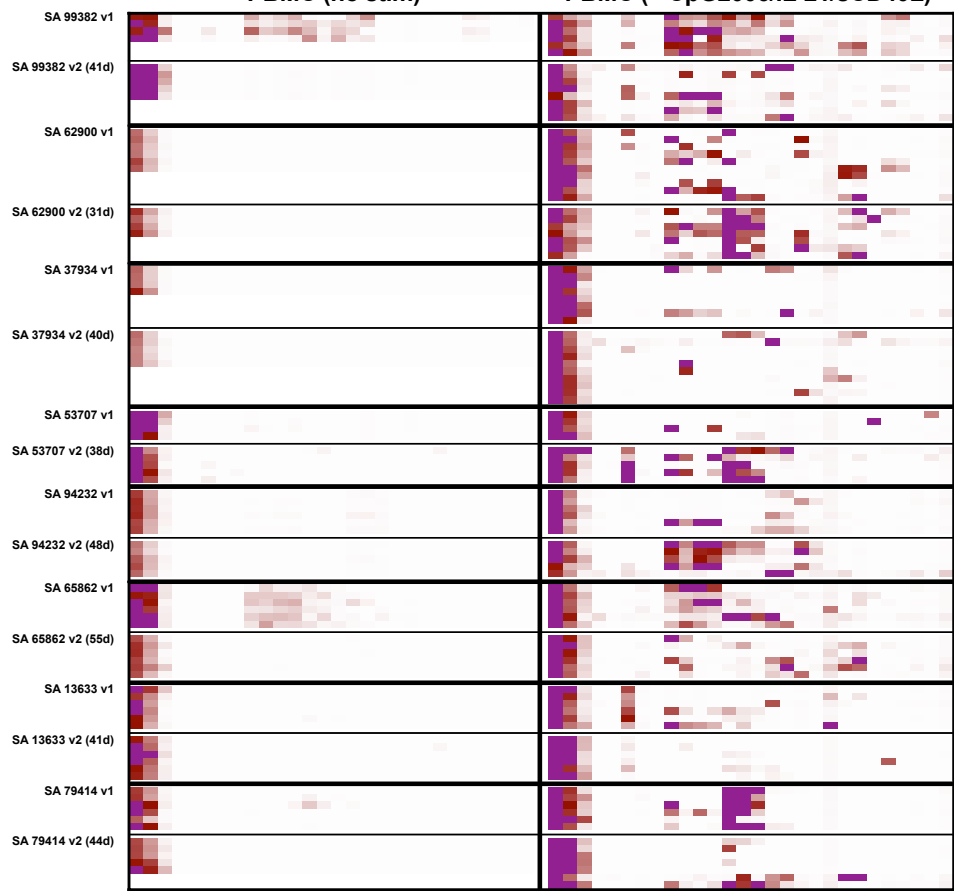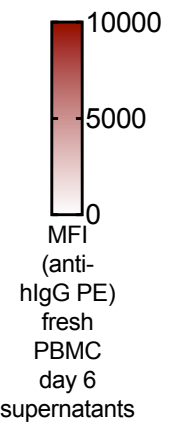

| patient ID | Days Infected Before Acute Visit (patient reported) |
|------------|-----------------------------------------------------|
| 99382      | unknown                                             |
| 62900      | 6                                                   |
| 37934      | 2                                                   |
| 53707      | 2                                                   |
| 94232      | 14                                                  |
| 65862      | 3                                                   |
| 13633      | 2                                                   |
| 79414      | 7                                                   |

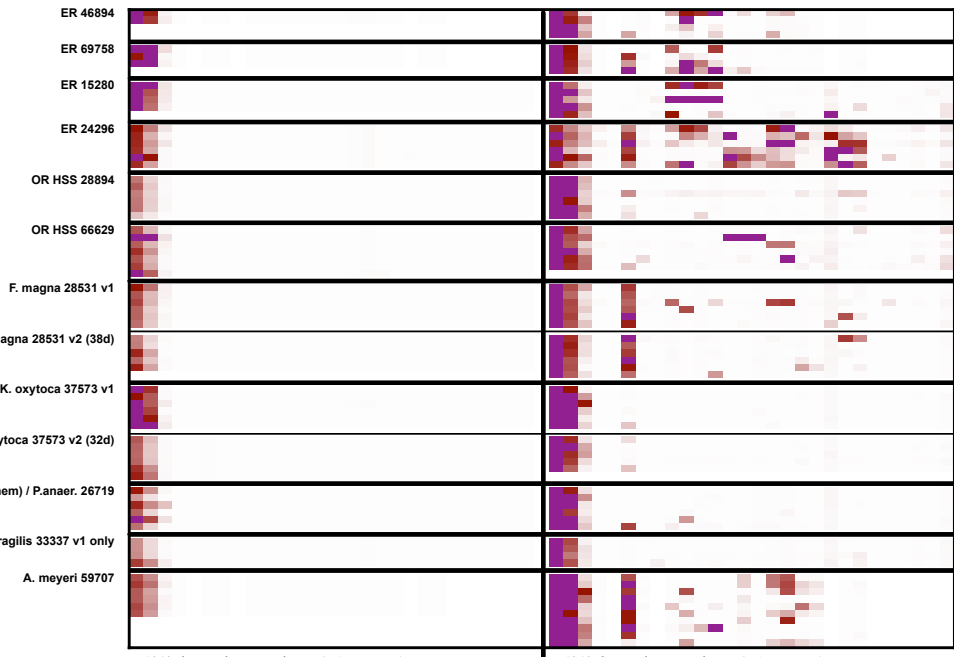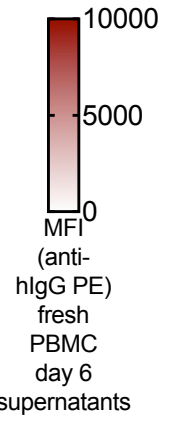

Supplement: mbo002183773sf4.pdf [file mbo002183773sf4.pdf]
