# Supplementary material for: Human Memory B Cells Targeting Staphylococcus aureus Exotoxins Are Prevalent with Skin and Soft Tissue Infection
Source: PubMed Central journal article supplement (PMC5850327; doi:10.1128/mbio.02125-17), 2018-03-13

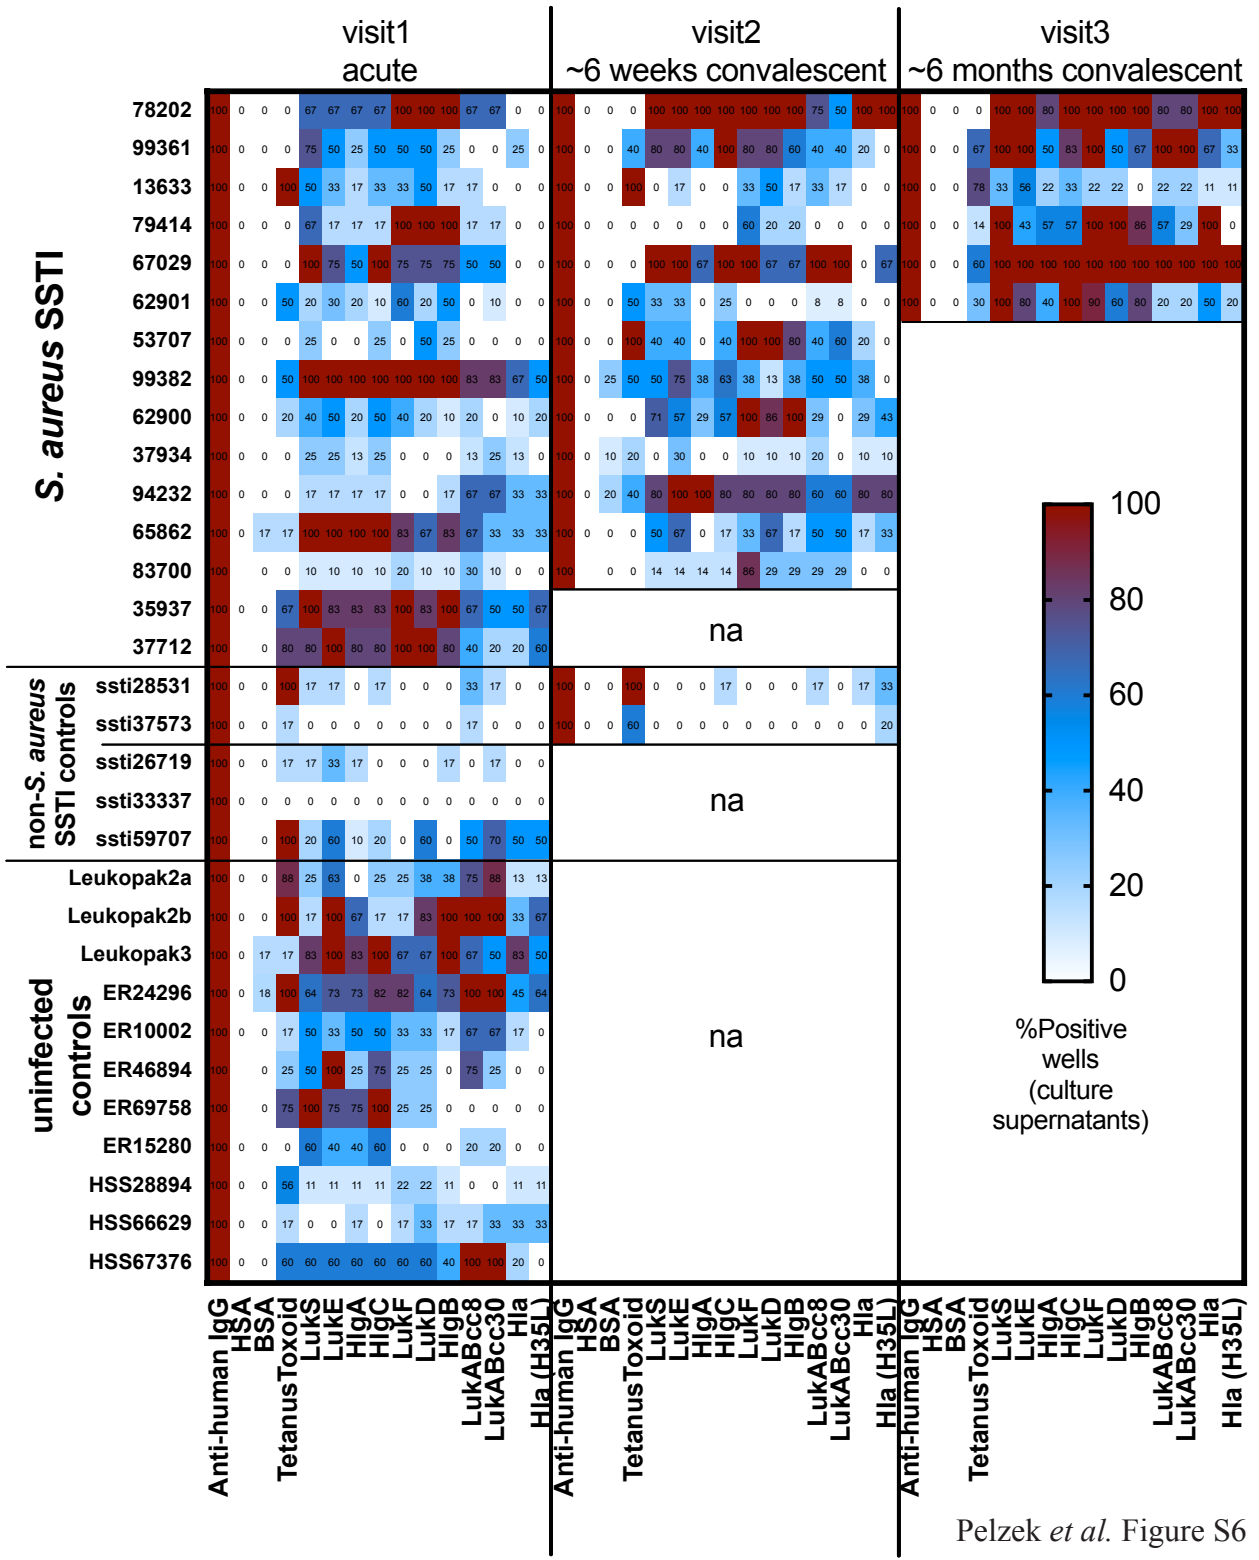

Supplement: mbo002183773sf6.pdf [file mbo002183773sf6.pdf]
