# Supplementary material for: Human Memory B Cells Targeting Staphylococcus aureus Exotoxins Are Prevalent with Skin and Soft Tissue Infection
Source: PubMed Central journal article supplement (PMC5850327; doi:10.1128/mbio.02125-17), 2018-03-13
Supplement: mbo002183773st1.pdf [file mbo002183773st1.pdf]

**Table S1: *S. aureus* skin and soft-tissue infection patient data**

|                                                                         |                                            | #             | %      | #  | %     |
|-------------------------------------------------------------------------|--------------------------------------------|---------------|--------|----|-------|
| <b>Gender</b>                                                           |                                            | (n = 54)      |        |    |       |
|                                                                         | Male                                       | 42            | 77.8%  |    |       |
|                                                                         | Female                                     | 12            | 22.2%  |    |       |
| <b>Age (years) (Mean +/- SD)<sup>a</sup></b>                            |                                            | 45.0 +/- 13.2 |        |    |       |
| <b>Race/Ethnicity</b>                                                   |                                            | (n = 54)      |        |    |       |
|                                                                         | White                                      | 17            | 31.5%  |    |       |
|                                                                         | Black                                      | 9             | 16.7%  |    |       |
|                                                                         | Asian                                      | 4             | 7.4%   |    |       |
|                                                                         | Other                                      | 24            | 44.4%  |    |       |
|                                                                         | Hispanic                                   |               |        | 14 | 25.9% |
|                                                                         | Latino                                     |               |        | 8  | 14.8% |
|                                                                         | Semitic, Mix                               |               |        | 2  | 3.7%  |
| <b>Current Living Situation</b>                                         |                                            | (n = 54)      |        |    |       |
|                                                                         | House                                      | 41            | 75.9%  |    |       |
|                                                                         | Shelter/Group/Street                       | 12            | 22.2%  |    |       |
|                                                                         | No Answer                                  | 1             | 1.9%   |    |       |
| <b>Ever homeless</b>                                                    |                                            | (n = 54)      |        |    |       |
|                                                                         | Ever Homeless                              | 20            | 37.0%  |    |       |
|                                                                         | Never homeless                             | 33            | 61.1%  |    |       |
|                                                                         | No answer                                  | 1             | 1.9%   |    |       |
| <b>Alcohol use</b>                                                      |                                            | (n = 54)      |        |    |       |
|                                                                         | 0-4 drinks/week                            | 42            | 77.8%  |    |       |
|                                                                         | 5+ drinks/week                             | 10            | 18.5%  |    |       |
|                                                                         | no answer                                  | 2             | 3.7%   |    |       |
| <b>Drug use</b>                                                         |                                            | (n = 54)      |        |    |       |
|                                                                         | Drug use (last 6 months)                   | 18            | 33.3%  |    |       |
|                                                                         | Drug use (last 1 year)                     | 18            | 33.3%  |    |       |
|                                                                         | Cigarette smoker                           | 19            | 35.2%  |    |       |
| <b>Previous to acute visit</b>                                          |                                            | (n = 54)      |        |    |       |
|                                                                         | antibiotics                                | 11            | 20.4%  |    |       |
|                                                                         | antibiotics (previous 6 months)            | 14            | 25.9%  |    |       |
|                                                                         | clinical drainage of abscess               | 3             | 5.6%   |    |       |
|                                                                         | immunosuppressive agents                   | 5             | 9.3%   |    |       |
|                                                                         | hospitalized past 12 months                | 10            | 18.5%  |    |       |
| <b>History of previous <i>S. aureus</i> exposure (patient reported)</b> |                                            | (n = 54)      |        |    |       |
|                                                                         | history of <i>S. aureus</i> MRSA infection | 4             | 7.4%   |    |       |
|                                                                         | Cared for person with skin infection       | 9             | 16.7%  |    |       |
|                                                                         | Cared for person with 'MRSA' or 'Staph'    | 3             | 5.6%   |    |       |
| <b>Days infected before acute presentation (patient reported)</b>       |                                            | (n = 54)      |        |    |       |
|                                                                         | 0-1 days                                   | 0             | -      |    |       |
|                                                                         | 2-3 days                                   | 14            | 25.9%  |    |       |
|                                                                         | 4-6 days                                   | 17            | 31.5%  |    |       |
|                                                                         | 7-10 days                                  | 14            | 25.9%  |    |       |
|                                                                         | 12-15 days                                 | 5             | 9.3%   |    |       |
|                                                                         | 16+ days                                   | 3             | 5.6%   |    |       |
|                                                                         | no answer                                  | 1             | 1.9%   |    |       |
| <b>Chronic Comorbidities<sup>b</sup></b>                                |                                            | (n = 54)      |        |    |       |
|                                                                         | None reported                              | 27            | 50.0%  |    |       |
|                                                                         | Chronic Co-morbidity                       | 27            | 50%    |    |       |
|                                                                         | Other Immunocompromising Disease           | 21            | 38.90% |    |       |
|                                                                         | Diabetes                                   | 9             | 16.7%  |    |       |
|                                                                         | Other                                      | 4             | 7.4%   |    |       |

|                                                                                                                                                                                        |                                   |              |                  |              |                    |
|----------------------------------------------------------------------------------------------------------------------------------------------------------------------------------------|-----------------------------------|--------------|------------------|--------------|--------------------|
| <b>Other Immunocompromising Disease<sup>c,d,e</sup></b>                                                                                                                                |                                   | (n = 21)     |                  |              |                    |
|                                                                                                                                                                                        | HCV                               | 7            | 13.0%            |              |                    |
|                                                                                                                                                                                        | HTN                               | 4            | 7.4%             |              |                    |
|                                                                                                                                                                                        | recurrent abscesses               | 5            | 9.3%             |              |                    |
| <b>Abscess Location<sup>f</sup></b>                                                                                                                                                    |                                   | (n = 54)     |                  |              |                    |
|                                                                                                                                                                                        | Head/neck                         | 9            | 16.7%            |              |                    |
|                                                                                                                                                                                        | Torso                             | 7            | 13.0%            |              |                    |
|                                                                                                                                                                                        | Groin/perineum/buttocks           | 8            | 14.8%            |              |                    |
|                                                                                                                                                                                        | Upper extremity                   | 19           | 35.2%            |              |                    |
|                                                                                                                                                                                        | Lower extremity                   | 14           | 25.9%            |              |                    |
| <b>At acute visit</b>                                                                                                                                                                  |                                   |              |                  |              |                    |
|                                                                                                                                                                                        | pus draining spontaneously        | 30           | 55.6%            |              |                    |
| <b>Result of visit</b>                                                                                                                                                                 |                                   | (n = 54)     |                  |              |                    |
|                                                                                                                                                                                        | Discharged                        | 37           | 68.5%            |              |                    |
|                                                                                                                                                                                        | Hospital                          | 6            | 11.1%            |              |                    |
|                                                                                                                                                                                        | Observation in ER                 | 10           | 18.5%            |              |                    |
|                                                                                                                                                                                        | Detox                             | 1            | 1.9%             |              |                    |
| <b>Antibiotic prescribed after acute ER visit?</b>                                                                                                                                     |                                   | (n = 54)     |                  |              |                    |
|                                                                                                                                                                                        | antibiotic                        | 45           | 83.3%            |              |                    |
|                                                                                                                                                                                        | no antibiotic                     | 8            | 14.8%            |              |                    |
|                                                                                                                                                                                        | Unknown                           | 1            | 1.9%             |              |                    |
| <b>Patient Follow-up visits<sup>g</sup></b>                                                                                                                                            |                                   | (n = 54)     |                  | range (days) | mean (days) +/- SD |
|                                                                                                                                                                                        | visit 2, convalescent, short-term | 41           | 75.90%           | (21-93)      | 41.9 +/- 10.9      |
|                                                                                                                                                                                        | visit 3, convalescent, long-term  | 25           | 46.30%           | (154-389)    | 198.5 +/- 46.9     |
| <b>Infections between visits<sup>h,i</sup></b>                                                                                                                                         |                                   | <b>v1-v2</b> | <b>v1-v2 (%)</b> |              |                    |
|                                                                                                                                                                                        | Abscess                           | 3            | 5.6%             |              |                    |
|                                                                                                                                                                                        | Total                             | 9            | 16.7%            |              |                    |
|                                                                                                                                                                                        |                                   | <b>v2-v3</b> | <b>v2-v3 (%)</b> |              |                    |
|                                                                                                                                                                                        | Abscess                           | 4            | 7.4%             |              |                    |
|                                                                                                                                                                                        | Total                             | 8            | 14.8%            |              |                    |
| Footnotes:                                                                                                                                                                             |                                   |              |                  |              |                    |
| a. Uninfected controls (n = 23) were 91.3% male, with mean age 48.9 +/- 12.6 years old (range 28-75 years)                                                                             |                                   |              |                  |              |                    |
| b. Each of these chronic comorbidities was reported once: Eczema/chronic skin condition, chronic renal failure, congestive heart failure, HIV+ non immunosuppressed                    |                                   |              |                  |              |                    |
| c. Each of these conditions was reported once: HPV, cancer, renal disease, hyperlipidemia, pulmonary fibrosis, glaucoma, coronary artery disease, asthma, diverticulosis               |                                   |              |                  |              |                    |
| d. Each of these conditions was reported twice: Epilepsy/seizures, Hypothyroidism, GERD, IVDU                                                                                          |                                   |              |                  |              |                    |
| e. Patients 10000, 13017, 20986, 37712, 65862 had recurrent abscesses                                                                                                                  |                                   |              |                  |              |                    |
| f. Three patients had multiple abscesses                                                                                                                                               |                                   |              |                  |              |                    |
| g. One patient did not attend the six-week visit, but did attend the six-month visit (189 days post-acute). This value was not used in calculating mean, standard deviation, or range. |                                   |              |                  |              |                    |
| h. Each of these conditions was reported once between acute and six-week visit: Bumps, current infection never resolved, cellulitis, unknown, cold sore, herpes zoster                 |                                   |              |                  |              |                    |
| i. Each of these conditions was reported once between six-week and six-month visits: cellulitis, fungal infection, pneumonia, folliculitis                                             |                                   |              |                  |              |                    |
