# Supplementary material for: Human Memory B Cells Targeting Staphylococcus aureus Exotoxins Are Prevalent with Skin and Soft Tissue Infection
Source: PubMed Central journal article supplement (PMC5850327; doi:10.1128/mbio.02125-17), 2018-03-13
Supplement: mbo002183773st2.pdf [file mbo002183773st2.pdf]

**Table S2: *S. aureus* infecting and colonizing isolates from SSTI patients**

|                                                                      |                           | # (%)             |
|----------------------------------------------------------------------|---------------------------|-------------------|
| <b>Micro-plate growth of infecting isolate</b>                       |                           | (n = 54 patients) |
|                                                                      | Heavy growth              | 21 (38.9)         |
|                                                                      | Moderate growth           | 20 (37.0)         |
|                                                                      | Information not available | 13 (24.1)         |
| <b>Patients with <i>S. aureus</i> infection<sup>a</sup></b>          |                           | (n = 54 patients) |
|                                                                      | MRSA                      | 32 (59.3)         |
|                                                                      | MSSA                      | 22 (40.7)         |
|                                                                      | single <i>spa</i> type    | 48 (88.9)         |
|                                                                      | multiple <i>spa</i> types | 6 (11.1)          |
|                                                                      |                           | (n = 53 patients) |
|                                                                      | <i>pvl</i> -positive      | 46 (86.8)         |
|                                                                      | <i>spa</i> type 1/t008    | 22 (41.5)         |
|                                                                      | USA300                    | 13 (24.5)         |
| <b>Patients colonized with <i>S. aureus</i></b>                      |                           | (n = 54 patients) |
|                                                                      | colonized (nares)         | 13 (24.1)         |
|                                                                      | colonized (groin)         | 12 (22.2)         |
|                                                                      | colonized (total)         | 25 (46.3)         |
|                                                                      |                           | (n = 25 patients) |
|                                                                      | single <i>spa</i> type    | 22 (40.7)         |
|                                                                      | multiple <i>spa</i> types | 3 (12.0)          |
|                                                                      | MRSA                      | 11 (44.0)         |
|                                                                      | MSSA                      | 14 (56.0)         |
| <b>Infection site <i>S. aureus</i> isolates</b>                      |                           | (n = 63 isolates) |
|                                                                      | MRSA                      | 39 (61.9)         |
|                                                                      | MSSA                      | 24 (38.1)         |
|                                                                      | <i>pvl</i> -positive      | 56 (88.9)         |
|                                                                      | <i>spa</i> type 1/t008    | 23 (36.5)         |
|                                                                      | USA300                    | 15 (23.8)         |
| <b>Colonizing <i>S. aureus</i> isolates</b>                          |                           | (n = 29 isolates) |
|                                                                      | MRSA                      | 12 (41.4)         |
|                                                                      | MSSA                      | 17 (58.6)         |
|                                                                      | <i>pvl</i> -positive      | 18 (62.1)         |
|                                                                      | <i>spa</i> type 1/t008    | 9 (31.0)          |
|                                                                      | USA300                    | 6 (20.7)          |
| <b>Colonizing / infecting isolate match</b>                          |                           | (n = 25 patients) |
|                                                                      | same <i>spa</i> type      | 16 (64.0)         |
|                                                                      | different <i>spa</i> type | 9 (36.0)          |
| Footnotes:                                                           |                           |                   |
| a. For one patient, the infecting <i>S. aureus</i> isolate was lost. |                           |                   |
