# Supplementary material for: Human Memory B Cells Targeting Staphylococcus aureus Exotoxins Are Prevalent with Skin and Soft Tissue Infection
Source: PubMed Central journal article supplement (PMC5850327; doi:10.1128/mbio.02125-17), 2018-03-13
Supplement: mbo002183773st3.pdf [file mbo002183773st3.pdf]

**Table S3. Antigens in multiplex panel for assessment of immunoglobulin binding**

|                                                                     | Antigen                                                                                  | Abbreviation                    | Source                           | GenBank Locus <sup>1</sup> |
|---------------------------------------------------------------------|------------------------------------------------------------------------------------------|---------------------------------|----------------------------------|----------------------------|
| <b>Positive controls</b>                                            |                                                                                          |                                 |                                  |                            |
|                                                                     | Tetanus Toxoid                                                                           | Tet Tox, TT                     | Enzo Life Sciences               |                            |
|                                                                     | Phosphorylcholine-16-BSA                                                                 | PC16-BSA                        | Biosearch Technologies           |                            |
|                                                                     | Phosphorylcholine-12-BSA                                                                 | PC12-BSA                        | Biosearch Technologies           |                            |
|                                                                     | Phosphorylcholine-4-BSA                                                                  | PC4-BSA                         | Biosearch Technologies           |                            |
| <b>Ig-binding</b>                                                   |                                                                                          |                                 |                                  |                            |
|                                                                     | anti-human IgG (Fc-gamma Specific)                                                       | anti-hIgG, $\alpha$ -hIgG       | Jackson Immunoresearch           |                            |
|                                                                     | SpA domain D- WT (5x) <sup>2</sup>                                                       | SpAD-WT5x                       | G.J.S., D.N.H. (NYU)             |                            |
|                                                                     | SpA domain D- FcNull (5x) <sup>3</sup>                                                   | SpAD-FcNull5x                   | G.J.S., D.N.H. (NYU)             |                            |
| <b>Negative controls</b>                                            |                                                                                          |                                 |                                  |                            |
|                                                                     | Bovine Serum Albumin                                                                     | BSA                             | Sigma Aldrich                    |                            |
|                                                                     | Human Serum Albumin                                                                      | HSA                             | Sigma Aldrich                    |                            |
|                                                                     | Azobenzenearsonate                                                                       | ABA                             | Biosearch Technologies           |                            |
| <b><i>S. aureus</i> protein fractions</b>                           |                                                                                          |                                 |                                  |                            |
|                                                                     | surface extract                                                                          |                                 | V.J.T. (NYU)                     |                            |
|                                                                     | cytoplasmic extract                                                                      |                                 | V.J.T. (NYU)                     |                            |
|                                                                     | Exoproteins                                                                              |                                 | V.J.T. (NYU)                     |                            |
| <b><i>S. aureus</i> Exotoxins</b>                                   |                                                                                          |                                 |                                  |                            |
|                                                                     | Leukocidin S                                                                             | LukS-PV                         | V.J.T. (NYU)                     | SAUSA300_1382              |
|                                                                     | Leukocidin E                                                                             | LukE                            | V.J.T. (NYU)                     | NWMN_1719                  |
|                                                                     | Hemolysin-gamma A                                                                        | HlgA                            | V.J.T. (NYU)                     | NWMN_2318                  |
|                                                                     | Hemolysin-gamma C                                                                        | HlgC                            | V.J.T. (NYU)                     | NWMN_2319                  |
|                                                                     | Leukocidin F                                                                             | LukF-PV                         | V.J.T. (NYU)                     | SAUSA300_1381              |
|                                                                     | Leukocidin D                                                                             | LukD                            | V.J.T. (NYU)                     | NWMN_1718                  |
|                                                                     | Hemolysin-gamma B                                                                        | HlgB                            | V.J.T. (NYU)                     | NWMN_2320                  |
|                                                                     | Leukocidin AB cc8                                                                        | LukABcc8                        | V.J.T. (NYU)                     | NWMN_1928, 1927            |
|                                                                     | Leukocidin AB cc30                                                                       | LukABcc30                       | V.J.T. (NYU)                     | SAR2108, 2107              |
|                                                                     | Alpha Toxin (Alpha Hemolysin)                                                            | Hla                             | V.J.T. (NYU)                     | NWMN_1073                  |
|                                                                     | Alpha Toxin (Alpha Hemolysin) H35L mutant                                                | Hla (H35L)                      | V.J.T. (NYU)                     |                            |
|                                                                     | $\beta$ -Toxin (Beta Toxin)                                                              | $\beta$ -Toxin                  | V.J.T. (NYU)                     | SACOL2003                  |
| <b><i>S. aureus</i> superantigens or Superantigen-like proteins</b> |                                                                                          |                                 |                                  |                            |
|                                                                     | Staphylococcal Enterotoxin B (chemically inactivated)                                    | SEB ( <i>S. aureus</i> )        | BEI Resources                    | SACOL0907                  |
|                                                                     | Staphylococcal Enterotoxin B (recombinant- inactive mutant, produced in <i>E. coli</i> ) | SEB ( $\tau$ , <i>E. coli</i> ) | BEI Resources                    | SACOL0907                  |
|                                                                     | Staphylococcal Enterotoxin G                                                             | SEG                             | V.J.T. (NYU)                     | SAR1916                    |
|                                                                     | Staphylococcal Enterotoxin I                                                             | SEI                             | V.J.T. (NYU)                     | SAR1919                    |
|                                                                     | Staphylococcal Enterotoxin M                                                             | SEM                             | V.J.T. (NYU)                     | SAR1920                    |
|                                                                     | Staphylococcal Enterotoxin N                                                             | SEN                             | V.J.T. (NYU)                     | SAR1917                    |
|                                                                     | Staphylococcal Enterotoxin O                                                             | SEO                             | V.J.T. (NYU)                     | SAR1921                    |
|                                                                     | Staphylococcal Enterotoxin U                                                             | SEU                             | V.J.T. (NYU)                     | SAR1918                    |
| <b><i>S. aureus</i> Phenol Soluble Modulins</b>                     |                                                                                          |                                 |                                  |                            |
|                                                                     | Phenol Soluble Modulin alpha 2                                                           | PSMa2                           | I.P.T. (Vanderbilt)              | SAUSA300_0424.3            |
|                                                                     | Phenol Soluble Modulin alpha 3                                                           | PSMa3                           | I.P.T. (Vanderbilt)              | SAUSA300_0424.2            |
|                                                                     | Phenol Soluble Modulin alpha 4                                                           | PSMa4                           | I.P.T. (Vanderbilt)              | SAUSA300_0424.1            |
|                                                                     | Phenol Soluble Modulin alpha 4-variant                                                   | PSMa4-variant                   | I.P.T. (Vanderbilt)              |                            |
| <b>Other <i>S. aureus</i> proteins</b>                              |                                                                                          |                                 |                                  |                            |
|                                                                     | Nuclease 1 -or- thermonuclease 1                                                         | Nuc1                            | V.J.T. (NYU)                     | SAUSA300_0776              |
|                                                                     | Staphylokinase                                                                           | Sak                             | V.J.T. (NYU)                     | SAUSA300_1922              |
|                                                                     | SspB                                                                                     | SspB                            | V.J.T. (NYU)                     | SAUSA300_0950              |
|                                                                     | SaeS $\Delta$ 92                                                                         | SaeS $\Delta$ 92                | V.J.T. (NYU)                     |                            |
|                                                                     | Rot                                                                                      | Rot                             | V.J.T. (NYU)                     |                            |
| <b>Other non-staphylococcal microbial antigens</b>                  |                                                                                          |                                 |                                  |                            |
|                                                                     | Pneumococcal polysaccharide 12                                                           | Pneumo ps12                     | ATCC                             |                            |
|                                                                     | Pneumococcal polysaccharide 23                                                           | Pneumo ps23                     | ATCC                             |                            |
|                                                                     | Poly N-acetyl glucosamine                                                                | PNAG                            | G.B. Pier (Harvard)              |                            |
|                                                                     | Pneumococcal Cell Wall Polysaccharide                                                    | Pneumo CWPS                     | Statens Serum Institut (Denmark) |                            |
|                                                                     | <i>S. pneumoniae</i> pneumolysin                                                         | PLY                             | MyBiosource.com                  |                            |
|                                                                     | <i>S. pyogenes</i> ArcA                                                                  | ArcA                            | lab antigen stock                |                            |
|                                                                     | <i>S. pyogenes</i> superantigen                                                          | SP superantigen                 | lab antigen stock                |                            |

Footnotes:

- Sequences obtained from reference strain genomes with accession numbers as follows: FPR3757 (SAUSA300; NC\_007793.1), Newman (NWMN; NC\_009641.1), MRSA252 (SAR; BX571856.1), COL (SACOL; NC\_002951.2).
- SpA domain D- WT (5x) is a concatamer of five copies of SpA domain D.
- SpA domain D- FcNull (5x) is a concatamer of five copies of SpA domain D with three point mutations in each domain; in helix I, Q12K and Q13K, and in helix II N31A. These mutations destroy the Fc gamma-binding site and this construct therefore has only the non-immune binding of VH3-Fab containing IgG. References: Kim, Emolo, DeDent, Falugi, Missiakas & Schneewind (2012) *Infect Immun* 80: 3460-3470; and Cedergren, Andersson, Jansson, Uhlen & Nilsson (1993) *Protein Eng.* 6(4): 441-8.
